# Supplementary material for: The Relationship between Red Blood Cell Distribution Width and Incident Diabetes in Chinese Adults: A Cohort Study
Source: Hindawi journal article supplement (doi:10.1155/2020/1623247), 2020-02-27
Supplement: f1 [file 1623247.f1.pdf]

**Supplementary Table 1. Comparison of baseline characteristics between participants in and out of the analysis**

| Variables              | In the study      | Out of the study  | P value |
|------------------------|-------------------|-------------------|---------|
| Sample, n              | 16,971            | 37,863            | --      |
| Sex, women, %          | 41.3%             | 40.9%             | 0.08    |
| Age, y                 | 43.3±12.8         | 45.1±13.8         | <0.001  |
| FBG, mmol/L            | 5.0±0.5           | 5.3±0.2           | <0.001  |
| HbA1c, %               | 5.3±0.3           | 5.5±0.8           | <0.001  |
| RDW, %                 | 12.8±0.9          | 12.8±0.9          | 0.84    |
| BMI, kg/m <sup>2</sup> | 23.7±3.2          | 24.1±3.4          | <0.001  |
| SBP, mmHg              | 119.5±16.1        | 122.4±17.8        | <0.001  |
| DBP, mmHg              | 74.9±11.1         | 76.1±11.7         | <0.001  |
| TC, mmol/L             | 4.9±0.9           | 5.0±0.9           | <0.001  |
| TG, mmol/L*            | 1.13 (0.78, 1.67) | 1.21 (0.83, 1.83) | <0.001  |
| HDL, mmol/L            | 1.4±0.4           | 1.4±0.3           | <0.001  |

|                                      |                  |                   |        |
|--------------------------------------|------------------|-------------------|--------|
| LDL, mmol/L                          | 2.9±0.8          | 2.9±0.8           | 0.17   |
| eGFR, mL/min per 1.73 m <sup>2</sup> | 107.1±14.8       | 105.9±15.0        | <0.001 |
| WBC, 10 <sup>9</sup> /L              | 6.3±1.6          | 6.5±1.6           | <0.001 |
| ALT, U/L*                            | 17 (12, 15)      | 18 (13, 27)       | <0.001 |
| AST, U/L                             | 19.5±8.5         | 20.4±12.2         | <0.001 |
| RBC, 10 <sup>12</sup> /L             | 4.8±0.5          | 4.9±0.5           | 0.005  |
| HB, g/L                              | 144.5±16.0       | 145.4±16.0        | <0.001 |
| HCT, 10 <sup>9</sup> /L              | 0.44±0.04        | 0.44±0.04         | <0.001 |
| hs-CRP, mg/L                         | 0.59 (0.29, 1.2) | 0.65 (0.31, 1.35) | <0.001 |

---

**Note:**

1. Abbreviation: **FBG**, fasting blood glucose; **HbA1c**, glycated hemoglobin A1c; **RDW**, association between red blood cell distribution width; **BMI**, body mass index; **SBP**, systolic blood pressure; **DBP**, diastolic blood pressure; **TC**, total cholesterol; **TG**, triglyceride; **HDL-C**, high density lipoprotein cholesterol; **LDL-C**, low density lipoprotein cholesterol; **eGFR**, estimated glomerular filtration rate; **WBC**, white blood cell count; **ALT**, alanine transferase; **AST**, aspartate transferase; **RBC**, red blood cell count; **HB**, hemoglobin; **HCT**, hematocrit; **hs-CRP**, high

sensitivity c-reactive protein.

2. \*, abnormal distribution, data were presented as medium plus quartile range.

**Supplementary Table 2. Adjusted odd ratios and 95% confidence intervals for risk of diabetes across different red blood cell distribution width (RDW) quartile groups in 18,751 Chinese adults**

|        | Q1                | Q2                  | Q3                  | Q4                  | Each percent of RDW | P trend |
|--------|-------------------|---------------------|---------------------|---------------------|---------------------|---------|
| Sample | 4,984             | 4,007               | 5,431               | 4,329               | --                  | --      |
| Case   | 667               | 580                 | 919                 | 777                 | --                  | --      |
| Model  | <b>1.00 (ref)</b> | 1.01<br>(0.89,1.14) | 1.19<br>(1.07,1.33) | 1.28<br>(1.13,1.45) | 1.2<br>(1.11,1.3)   | <0.001  |

Note: Adjusting for age (y), sex, BMI (kg/m<sup>2</sup>), systolic blood pressure (mmHg), diastolic blood pressure (mmHg), total cholesterol (mmol/L), triglyceride (mmol/L), low density lipoprotein cholesterol (mmol/L), high density lipoprotein cholesterol (mmol/L), eGFR (mL/min per 1.73 m<sup>2</sup>), alanine transferase (U/L); aspartate transferase (U/L), hemoglobin (g/L), hematocrit (10<sup>9</sup>/L), red blood cell count (10<sup>12</sup>/L), white blood cell count (10<sup>9</sup>/L), and high sensitivity C-reactive protein (mg/L), fasting blood glucose (mmol/L) and glycated hemoglobin A1c (%).

**Supplementary Table 3. The adjusted hazardous ratios and 95% confidence interval for the risk of diabetes across red blood cell distribution width (RDW) quartile groups in 16,971 Chinese adults: stratified by sex and age**

| Group variables |       |        | Baseline RDW quartile groups (%) |                     |                    |                     | Each percent of RDW | P trend |
|-----------------|-------|--------|----------------------------------|---------------------|--------------------|---------------------|---------------------|---------|
|                 |       |        | Q1<br>≤12.2                      | Q2<br>12.3~12.6     | Q3<br>12.7~13.1    | Q4<br>≥13.2         |                     |         |
| Sex             | Men   | Sample | 2,750                            | 2,217               | 2,603              | 2,386               | --                  | --      |
|                 |       | Case   | 393                              | 327                 | 470                | 460                 | --                  | --      |
|                 |       | Model  | <b>1.00 (ref)</b>                | 0.96<br>(0.82,1.13) | 1.12<br>(0.96,1.3) | 1.2<br>(1.02,1.41)  | 1.16<br>(1.04,1.3)  | 0.008   |
|                 | Women | Sample | 1,824                            | 1,399               | 1,594              | 2,198               | --                  | --      |
|                 |       | Case   | 226                              | 205                 | 246                | 376                 | --                  | --      |
|                 |       | Model  | <b>1.00 (ref)</b>                | 1.17<br>(0.96,1.43) | 1.3<br>(1.08,1.57) | 1.54<br>(1.26,1.87) | 1.35<br>(1.18,1.54) | <0.001  |

|     |           |        |                   |                     |                     |                     |                     |        |
|-----|-----------|--------|-------------------|---------------------|---------------------|---------------------|---------------------|--------|
| Age | <65 years | Sample | 4,389             | 3,448               | 3,925               | 4,245               | --                  | --     |
|     |           | Case   | 566               | 486                 | 639                 | 746                 | --                  | --     |
|     |           | Model  | <b>1.00 (ref)</b> | 1.04<br>(0.91,1.18) | 1.18<br>(1.05,1.34) | 1.32<br>(1.16,1.5)  | 1.23<br>(1.13,1.35) | <0.001 |
|     | ≥65 years | Sample | 185               | 168                 | 272                 | 339                 | --                  | --     |
|     |           | Case   | 53                | 46                  | 77                  | 90                  | --                  | --     |
|     |           | Model  | <b>1.00 (ref)</b> | 0.95<br>(0.6,1.49)  | 0.96<br>(0.63,1.47) | 1.09<br>(0.72,1.67) | 1.09<br>(0.82,1.46) | 0.54   |

---

Note: Adjusting for age (y), sex, BMI (kg/m<sup>2</sup>), systolic blood pressure (mmHg), diastolic blood pressure (mmHg), total cholesterol (mmol/L), triglyceride (mmol/L), low density lipoprotein cholesterol (mmol/L), high density lipoprotein cholesterol (mmol/L), eGFR (mL/min per 1.73 m<sup>2</sup>), alanine transferase (U/L); aspartate transferase (U/L), hemoglobin (g/L), hematocrit (10<sup>9</sup>/L), red blood cell count (10<sup>12</sup>/L), white blood cell count (10<sup>9</sup>/L), and high sensitivity C-reactive protein (mg/L), fasting blood glucose (mmol/L) and glycated hemoglobin A1c (%).
